# Supplementary material for: Yeast Kinesin-5 Motor Protein CIN8 Promotes Accurate Chromosome Segregation
Source: MDPI journal article supplement (doi:10.3390/cells11142144), 2022-07-07
Supplement: s1 [file s1]

**Table S1.** The list of yeast strains used in this study.

| Strains   | Relevant genotypes                                                                                                                                              | Reference   |
|-----------|-----------------------------------------------------------------------------------------------------------------------------------------------------------------|-------------|
| Y300 (WT) | MATa <i>ura3-1, his3-11, 15 leu2-3,112 trp1-1, ade2-1, can1-100</i>                                                                                             | Lab stock   |
| 3946-2-3  | MATa <i>cin8-AID-3×Flag::HIS3 ADH1-osTir1-9myc-URA3 PDS1-18myc-LEU2</i>                                                                                         | This study  |
| 3750-3-2  | MATa <i>cin8-AID-3×Flag::HIS3 ADH1-osTir1-9myc-URA3 kip1::KanMX</i>                                                                                             | This study  |
| YBL063W   | MATa <i>kip1::KanMX</i>                                                                                                                                         | Lab stock   |
| YEL061C   | MATa <i>cin8::KanMX</i>                                                                                                                                         | Lab stock   |
| JBY649    | MATa <i>PDS1-18myc-LEU2</i>                                                                                                                                     | Lab stock   |
| 3889-3-1  | MATa <i>cin8-AID-3×Flag::HIS3 ADH1-osTir1-9myc-URA3 kip1::KanMX PDS1-18myc-LEU2</i>                                                                             | This study  |
| 4232-6-2  | MATa <i>ADH1-osTir1-9myc-URA3 MTW1-GFP-Sphis5<sup>+</sup> SPC110-mCherry::Hygro</i>                                                                             | This study  |
| 4232-1-2  | MATa <i>cin8-AID-3×Flag::HIS3 ADH1-osTir1-9myc-URA3 MTW1-GFP-Sphis5<sup>+</sup> SPC110-mCherry::Hygro</i>                                                       | This study  |
| 4232-7-2  | MATa <i>cin8-AID-3×Flag::HIS3 ADH1-osTir1-9myc-URA3 kip1::KanMX MTW1-GFP-Sphis5<sup>+</sup> SPC110-mCherry::Hygro</i>                                           | This study  |
| 4244-3-4  | MATa <i>ADH1-osTir1-9myc-URA3 promURA3::tetR::GFP-LEU2 CENIV::tetOX448::URA3 SPC110-mCherry::Hygro</i>                                                          | This study  |
| 4244-2-1  | MATa <i>cin8-AID-3×Flag::HIS3 ADH1-osTir1-9myc-URA3 promURA3::tetR::GFP-LEU2 CENIV::tetOX448::URA3 SPC110-mCherry::Hygro</i>                                    | This study  |
| 4327-9-2  | MATa <i>promURA3::tetR::GFP-LEU2 CENIV::tetOX448::URA3 SPC110-mCherry::Hygro mad1::HIS3</i>                                                                     | This study  |
| 4236-1-3  | MATa <i>cin8-AID-3×Flag::HIS3 ADH1-osTir1-9myc-URA3 promURA3::tetR::GFP-LEU2 CENIV::tetOX448::URA3 SPC110-mCherry::Hygro mad1::HIS3</i>                         | This study  |
| 4003-1-3  | MATa <i>cin8-AID-3×Flag::HIS3 ADH1-osTir1-9myc-URA3 kip1::KanMX mad1::HIS3 PDS1-18myc-LEU2</i>                                                                  | This study  |
| 771-4-1   | MATa <i>mad1::HIS3 PDS1-18myc-LEU2</i>                                                                                                                          | This study  |
| 4260-2-4  | MATa <i>cin8-AID-3×Flag::HIS3 ADH1-osTir1-9myc-URA3 kip1::KanMX promURA3::tetR::GFP-LEU2 CENIV::tetOX448::URA3 SPC110-mCherry::Hygro</i>                        | This study  |
| 4235-9-3  | MATa <i>cin8-AID-3×Flag::HIS3 ADH1-osTir1-9myc-URA3 kip1::KanMX mad1::HIS3 promURA3::tetR::GFP-LEU2 CENIV::tetOX448::URA3 SPC110-mCherry::Hygro</i>             | This study  |
| 4330-7-4  | MATa <i>dam1-3A (S257A S265A S292A)::KanMX promURA3::tetR::GFP-LEU2 CENIV::tetOX448::URA3 SPC110-mCherry::Hygro</i>                                             | This study  |
| 4244-6-3  | MATa <i>cin8-AID-3×Flag::HIS3 ADH1-osTir1-9myc-URA3 dam1-3A (S257A S265A S292A)::KanMX promURA3::tetR::GFP-LEU2 CENIV::tetOX448::URA3 SPC110-mCherry::Hygro</i> | This study  |
| 4332-13-2 | MATa <i>cin8-AID-3×Flag::HIS3 ADH1-osTir1-9myc-URA3 PDS1-18myc-LEU2 dam1-3A (S257A S265A S292A)::KanMX</i>                                                      | This study  |
| 2425-7-2  | MATa <i>dam1-3A (S257A S265A S292A)::KanMX PDS1-18myc-LEU2</i>                                                                                                  | Lab stock   |
| 4332-5-4  | MATa <i>cin8-AID-3×Flag::HIS3 ADH1-osTir1-9myc-URA3 PDS1-18myc-LEU2</i>                                                                                         | This study  |
| 2715-6-4  | MATa <i>ipl1-321 PDS1-18myc-LEU2</i>                                                                                                                            | Lab stock   |
| 4333-8-1  | MATa <i>ipl1-321 cin8-AID-3×Flag::HIS3 ADH1-osTir1-9myc-URA3 PDS1-18myc-LEU2</i>                                                                                | This study  |
| X3338-8D  | MATa <i>ADH1-osTir1-9myc-URA3</i>                                                                                                                               | X. Zhao lab |
| T1129-3C  | MATa <i>ADH1-osTir1-9myc-URA3</i>                                                                                                                               | X. Zhao lab |
